# Supplementary material for: Genome-Wide Expression Analysis in Fibroblast Cell Lines from Probands with Pallister Killian Syndrome
Source: PLoS One. 2014 Oct 16;9(10):e108853. doi: 10.1371/journal.pone.0108853 (PMC4199614; doi:10.1371/journal.pone.0108853)
Supplement: Table S2 — List of down-regulated genes in patients with PKS. (XLS) [file pone.0108853.s003.xls]

## Sheet: Sheet1
Symbol	Gene Name	Chr	Cytoband	#_Present	StDev	Range	Mean_Ctrl	Mean_PKS	PKS-Ctrl	p_ttest
ZFPM2	zinc finger protein, multitype 2	8	8q23	16	1.6674	5.17889	7.68127	5.67646	-2.00481	0.00390221
IL6	interleukin 6 (interferon, beta 2)	7	7p21	26	1.75321	6.22417	11.6281	9.76267	-1.86543	0.00235054
RSPO3	R-spondin 3 homolog (Xenopus laevis)	6	6q22.33	23	1.23701	5.56993	8.55341	6.83755	-1.71586	0.00487076
FGF9	fibroblast growth factor 9 (glia-activating factor)	13	13q11-q12	15	1.45796	5.5332	8.77498	7.25412	-1.52086	0.0116527
GATA6	GATA binding protein 6	18	18q11.1-q11.2	26	1.41917	5.24126	8.56536	7.11726	-1.44811	0.00938238
DEPDC6	DEP domain containing 6	8	8q24.12	26	1.46071	5.13687	9.20734	7.80247	-1.40487	0.0144192
SLC1A1	solute carrier family 1 (neuronal/epithelial high affinity glutamate transporter, system Xag), member 1	9	9p24	26	1.03601	4.22031	9.11246	7.71368	-1.39878	1.80097e-05
TGM2	transglutaminase 2 (C polypeptide, protein-glutamine-gamma-glutamyltransferase)	20	20q12	26	0.995348	3.57649	9.09639	7.7338	-1.3626	0.000496715
APBB1IP	amyloid beta (A4) precursor protein-binding, family B, member 1 interacting protein	10	10p12.1	24	0.983443	3.60071	9.8706	8.53972	-1.33087	0.000280927
MOXD1	monooxygenase, DBH-like 1	6	6q23.1-q23.3	26	1.12683	4.09699	11.7426	10.4157	-1.32689	0.00563035
NPR3	natriuretic peptide receptor C/guanylate cyclase C (atrionatriuretic peptide receptor C)	5	5p14-p13	24	0.952936	3.49209	8.61932	7.35661	-1.26271	0.00525858
C4orf49	chromosome 4 open reading frame 49	4	4q31.1	19	1.27733	5.1398	9.76141	8.55395	-1.20746	0.0106288
PTN	pleiotrophin	7	7q33-q34	26	0.959505	3.16837	8.54349	7.34588	-1.19762	0.00113395
IFIT1	interferon-induced protein with tetratricopeptide repeats 1	10	10q25-q26	17	1.19957	4.01744	8.69134	7.51088	-1.18046	0.0328125
CDH10	cadherin 10, type 2 (T2-cadherin)	5	5p14-p13	23	1.01815	3.41937	6.70155	5.54441	-1.15714	0.0325695
VAT1L	vesicle amine transport protein 1 homolog (T. californica)-like	16	16q23.1	2	0.900963	3.1765	7.88911	6.73481	-1.15431	0.00608706
C5orf23	chromosome 5 open reading frame 23	5	5p13.3	26	0.989128	3.60169	10.4522	9.37553	-1.07671	0.0276685
ST6GALNAC5	ST6 (alpha-N-acetyl-neuraminyl-2,3-beta-galactosyl-1,3)-N-acetylgalactosaminide alpha-2,6-sialyltransferase 5	1	1p31.1	26	1.24122	4.38218	7.72096	6.66172	-1.05924	0.0310571
SYPL2	synaptophysin-like 2	1	1p13.3	18	0.650233	2.37836	7.61053	6.61614	-0.994387	0.00204619
C4orf18	chromosome 4 open reading frame 18	4	4q32.1	26	1.20772	5.06309	8.65612	7.66882	-0.9873	0.0301625
PLCE1	phospholipase C, epsilon 1	10	10q23	26	0.791	3.31147	7.2483	6.3038	-0.944506	0.0128147
RHOJ	ras homolog gene family, member J	14	14q23.2	26	0.86988	3.36409	7.17524	6.2328	-0.942443	0.0315566
IGFBP5	insulin-like growth factor binding protein 5	2	2q33-q36	26	0.962725	3.23063	8.55925	7.61912	-0.940127	0.0112785
SOX9	SRY (sex determining region Y)-box 9	17	17q24.3-q25.1	25	1.12055	4.61922	8.73349	7.83808	-0.895417	0.0279008
ACVR2A	activin A receptor, type IIA	2	2q22.3	26	0.890958	3.41456	8.9844	8.11473	-0.86967	0.0248428
TCF21	transcription factor 21	6	6pter-qter	9	0.759729	2.77868	7.0965	6.23266	-0.863845	0.02438
MEIS2	Meis homeobox 2	15	15q14	26	0.558609	2.35916	10.6982	9.85344	-0.84473	0.000135733
NLGN1	neuroligin 1	3	3q26.31	26	0.899816	3.52472	6.81731	5.97286	-0.844449	0.0323096
OXTR	oxytocin receptor	3	3p25	25	1.22127	6.36286	11.4546	10.6152	-0.839384	0.0383759
RAB3B	RAB3B, member RAS oncogene family	1	1p32-p31	26	1.02846	3.99636	10.1359	9.30379	-0.832156	0.0293069
SULF1	sulfatase 1	8	8q13.2-q13.3	26	1.03271	4.08747	13.252	12.4215	-0.83054	0.0173998
FBN2	fibrillin 2	5	5q23-q31	26	1.06103	5.10984	12.3319	11.5157	-0.816234	0.0289764
HSPA2	heat shock 70kDa protein 2	14	14q24.1	26	0.887471	3.01124	11.4344	10.6282	-0.806211	0.0175783
LXN	latexin	3	3q25.32	21	1.05695	4.61596	8.02585	7.22533	-0.800529	0.0492208
SPOCK1	sparc/osteonectin, cwcv and kazal-like domains proteoglycan (testican) 1	5	5q31	26	0.859347	4.0873	12.5132	11.7241	-0.789117	0.013104
MACROD2	MACRO domain containing 2	20	20p12.1	17	0.735581	2.83525	6.51415	5.74385	-0.770295	0.0327597
HOXA5	homeobox A5	7	7p15-p14	24	0.823497	3.11166	7.77272	7.00824	-0.764478	0.0483572
LHX9	LIM homeobox 9	1	1q31-q32	20	0.869759	3.0081	7.77571	7.02443	-0.75128	0.0190404
IFI44L	interferon-induced protein 44-like	1	1p31.1	5	0.70338	2.79549	5.942	5.19739	-0.744606	0.0266574
VCAN	versican	5	5q14.3	26	0.625631	3.07696	12.7896	12.0526	-0.73693	0.000351645
C9orf167	chromosome 9 open reading frame 167	9	9q34.3	22	0.750552	3.4657	8.08638	7.3598	-0.726588	0.00494415
CSRP2	cysteine and glycine-rich protein 2	12	12q21.1	26	0.647534	2.90687	11.7234	11.0125	-0.710918	0.00249815
PODNL1	podocan-like 1	19	19p13.12	7	0.545817	2.20424	9.18335	8.4791	-0.704255	0.00156529
SERINC2	serine incorporator 2	1	1p35.1	20	0.712595	2.90943	9.27518	8.57215	-0.703032	0.0180492
TFAP2A	transcription factor AP-2 alpha (activating enhancer binding protein 2 alpha)	6	6p24	25	0.667033	2.89737	8.1516	7.44901	-0.702583	0.00964238
ZNF365	zinc finger protein 365	10	10q21.2	18	0.583062	2.60394	6.62605	5.92393	-0.702125	0.0189416
GUCY1B3	guanylate cyclase 1, soluble, beta 3	4	4q31.3-q33	19	0.69283	2.72204	7.27035	6.57399	-0.696365	0.0495108
GLS	glutaminase	2	2q32-q34	26	0.783724	3.61918	10.6071	9.9114	-0.695668	0.0372193
HOXA11	homeobox A11	7	7p15-p14	21	0.56548	2.07897	8.58472	7.89029	-0.69443	0.0083404
IVNS1ABP	influenza virus NS1A binding protein	1	1q25.1-q31.1	26	0.694916	2.35429	9.96622	9.28386	-0.682365	0.00966827
PPAPDC1A	phosphatidic acid phosphatase type 2 domain containing 1A	10	10q26.12	26	0.884728	2.90778	9.65721	8.97915	-0.678064	0.0485256
KLHDC9	kelch domain containing 9	1	1q23.3	0	0.53005	2.18746	7.43737	6.76107	-0.676294	0.0145682
LAMA4	laminin, alpha 4	6	6q21	26	0.485893	1.96821	10.5275	9.86327	-0.664273	3.3357e-05
FZD2	frizzled homolog 2 (Drosophila)	17	17q21.1	26	0.597416	2.72741	11.1864	10.5284	-0.658078	0.00274562
ERCC6	excision repair cross-complementing rodent repair deficiency, complementation group 6	10	10q11.23	26	0.633675	2.47365	7.9632	7.31115	-0.652046	0.0243112
SPAG4	sperm associated antigen 4	20	20q11.21	25	0.914094	3.3339	8.57902	7.9277	-0.65132	0.0470125
HLX	H2.0-like homeobox	1	1q41-q42.1	9	0.591343	2.27382	8.69275	8.04511	-0.647645	0.0173339
LEPR	leptin receptor	1	1p31	26	0.577317	2.05805	8.12861	7.48294	-0.645673	0.00847715
FAM155A	family with sequence similarity 155, member A	13	13q33.3	20	0.721104	2.33184	6.3197	5.68105	-0.638647	0.0328013
HTRA4	HtrA serine peptidase 4	8	8p11.22	19	0.55412	2.16257	8.51416	7.88251	-0.631651	0.00404601
FNIP2	folliculin interacting protein 2	4	4q32.1	26	0.55226	2.05305	9.55294	8.92786	-0.62508	0.00144436
KCNQ5	potassium voltage-gated channel, KQT-like subfamily, member 5	6	6q14	5	0.503909	2.37127	5.73016	5.10556	-0.624603	0.0204897
SIGIRR	single immunoglobulin and toll-interleukin 1 receptor (TIR) domain	11	11p15.5	26	0.471593	1.66663	9.7303	9.10918	-0.621122	0.00023007
ALDOC	aldolase C, fructose-bisphosphate	17	17cen-q12	25	0.588318	2.19375	9.79312	9.17966	-0.613461	0.0037745
LOC653602	hypothetical LOC653602	2	2p24.3	12	0.511856	1.94994	4.37516	3.76534	-0.609817	0.0166757
APBB2	amyloid beta (A4) precursor protein-binding, family B, member 2	4	4p14-p13	26	0.430072	1.92297	8.20349	7.59457	-0.608924	0.000478843
HOXA1	homeobox A1	7	7p15.3	17	0.662072	2.63343	7.42576	6.81858	-0.607175	0.0406711
VLDLR	very low density lipoprotein receptor	9	9p24	26	0.742304	2.74209	9.45682	8.85212	-0.604705	0.0416617
THSD4	thrombospondin, type I, domain containing 4	15	15q23	26	0.50632	2.05454	7.7409	7.13684	-0.604062	0.00896732
MOSPD2	motile sperm domain containing 2	X	Xp22.2	26	0.508599	2.11821	9.6204	9.02473	-0.595668	0.014251
TMEM159	transmembrane protein 159	16	16p12	26	0.560465	2.23551	8.3432	7.75012	-0.593081	0.00323354
PTPLA	protein tyrosine phosphatase-like (proline instead of catalytic arginine), member A	10	10p14-p13	26	0.608507	2.31603	11.5657	10.9739	-0.591772	0.00759357
SYNPO2	synaptopodin 2	4	4q26	24	0.69866	2.23439	8.15758	7.57436	-0.583215	0.0375491
ITGA4	integrin, alpha 4 (antigen CD49D, alpha 4 subunit of VLA-4 receptor)	2	2q31.3	26	0.664676	3.48984	9.1081	8.52699	-0.581107	0.0220544
MAMLD1	mastermind-like domain containing 1	X	Xq28	26	0.629971	2.62878	10.0745	9.49579	-0.578722	0.0361779
TNS3	tensin 3	7	7p12.3	26	0.662579	3.32846	12.0287	11.4547	-0.574009	0.0269186
USP53	ubiquitin specific peptidase 53	4	4q26	26	0.803317	3.38596	8.84047	8.26923	-0.571237	0.0416434
PLA2G16	phospholipase A2, group XVI	11	11q12.3	20	0.758375	3.43085	8.67668	8.10589	-0.570791	0.0231801
NET1	neuroepithelial cell transforming 1	10	10p15	26	0.627637	2.78275	8.93491	8.37306	-0.561855	0.0190228
EMILIN1	elastin microfibril interfacer 1	2	2p23.3-p23.2	26	0.685631	3.46247	10.5317	9.97223	-0.559505	0.014716
ALDH1B1	aldehyde dehydrogenase 1 family, member B1	9	9p11.1	26	0.668822	2.43942	9.693	9.13361	-0.559393	0.0443847
ARMC4	armadillo repeat containing 4	10	10p12.1-p11.23	12	0.534798	2.17521	6.4596	5.90227	-0.557326	0.0193378
GNAI1	guanine nucleotide binding protein (G protein), alpha inhibiting activity polypeptide 1	7	7q21	26	0.497464	2.00024	8.92999	8.37308	-0.556913	0.00342648
ODZ3	odz, odd Oz/ten-m homolog 3 (Drosophila)	4	4q35.1	26	0.458507	2.18135	8.36556	7.80938	-0.556179	0.00642827
TMEM178	transmembrane protein 178	2	2p22.1	20	0.67477	2.80777	5.55426	5.00463	-0.549636	0.037214
PDE1A	phosphodiesterase 1A, calmodulin-dependent	2	2q32.1	10	0.454722	1.65728	4.98745	4.45028	-0.537176	0.0287276
GDPD5	glycerophosphodiester phosphodiesterase domain containing 5	11	11q13.4-q13.5	26	0.442858	2.03459	9.00733	8.47438	-0.532954	0.0131843
SCRN1	secernin 1	7	7p14.3-p14.1	26	0.458438	1.73679	11.2808	10.7488	-0.53208	0.000661739
GSTM4	glutathione S-transferase mu 4	1	1p13.3	26	0.498933	1.9525	7.99303	7.46251	-0.530519	0.00414838
MET	met proto-oncogene (hepatocyte growth factor receptor)	7	7q31	26	0.659316	2.28335	9.12683	8.59636	-0.530465	0.0358965
NUAK2	NUAK family, SNF1-like kinase, 2	1	1q32.1	26	0.488414	1.73591	8.87721	8.35099	-0.526219	0.0121176
HS3ST3A1	heparan sulfate (glucosamine) 3-O-sulfotransferase 3A1	17	17p12-p11.2	26	0.61227	1.90451	9.24656	8.7221	-0.524461	0.0441064
WNK4	WNK lysine deficient protein kinase 4	17	17q21-q22	10	0.61097	2.29987	6.8405	6.32682	-0.513676	0.0422817
FAM113B	family with sequence similarity 113, member B	12	12q13.11	19	0.599263	2.53992	8.14504	7.63355	-0.511493	0.0341371
EVI1	ecotropic viral integration site 1	3	3q24-q28	3	0.471389	2.36041	5.3049	4.79499	-0.509908	0.0345937
LOC169834	hypothetical protein LOC169834	9	9q32	14	0.462833	2.02532	6.04446	5.53475	-0.50971	0.0230743
SLC8A1	solute carrier family 8 (sodium/calcium exchanger), member 1	2	2p23-p22	26	0.552634	2.27274	8.45782	7.94962	-0.508205	0.021804
CAP2	CAP, adenylate cyclase-associated protein, 2 (yeast)	6	6p22.3	26	0.6489	3.2557	10.1113	9.60458	-0.506685	0.0319011
MANBA	mannosidase, beta A, lysosomal	4	4q22-q25	26	0.531033	2.01677	9.31146	8.80659	-0.504871	0.0176818
C14orf50	chromosome 14 open reading frame 50	14	14q23.3	1	0.477638	2.14131	6.77125	6.27371	-0.497547	0.0393755
C1orf213	chromosome 1 open reading frame 213	1	1p36.12	26	0.485464	1.91004	8.76091	8.26642	-0.494486	0.0323486
PTPRF	protein tyrosine phosphatase, receptor type, F	1	1p34	26	0.568031	2.12062	9.4191	8.93089	-0.488217	0.0153112
LOC100130938	hypothetical protein LOC100130938	18	18q21.33	12	0.537523	2.69422	7.49473	7.00828	-0.486445	0.0475504
FBXO6	F-box protein 6	1	1p36.22	26	0.450101	2.08569	8.20596	7.7266	-0.479365	0.0155204
PC	pyruvate carboxylase	11	11q13.4-q13.5	1	0.395295	1.51949	8.23074	7.7521	-0.478644	0.00344752
IFIT2	interferon-induced protein with tetratricopeptide repeats 2	10	10q23-q25	18	0.50402	2.02959	7.36325	6.8949	-0.468355	0.0313917
CCDC80	coiled-coil domain containing 80	3	3q13.2	26	0.671962	2.85014	12.1979	11.7338	-0.464134	0.0394706
LITAF	lipopolysaccharide-induced TNF factor	16	16p13.13	26	0.327158	1.39565	10.7045	10.2448	-0.459727	4.22577e-05
GRIN2D	glutamate receptor, ionotropic, N-methyl D-aspartate 2D	19	19q13.1-qter	8	0.33742	1.31209	7.01681	6.55879	-0.458024	1.91507e-05
P2RX5	purinergic receptor P2X, ligand-gated ion channel, 5	17	17p13.3	8	0.508987	1.6943	7.4411	6.98946	-0.451634	0.0316104
FAM126A	family with sequence similarity 126, member A	7	7p15.3	26	0.32968	1.40694	9.1248	8.67564	-0.44917	0.00294968
PYGL	phosphorylase, glycogen, liver	14	14q21-q22	26	0.492858	2.08185	10.3128	9.8641	-0.4487	0.0241454
LEPREL1	leprecan-like 1	3	3q28	0	0.523205	1.96166	8.64148	8.1974	-0.444086	0.0298432
MT1F	metallothionein 1F	16	16q13	26	0.454142	1.63063	8.44495	8.00313	-0.441819	0.0477493
HHLA3	HERV-H LTR-associating 3	1	1p31.1	26	0.42865	1.65283	8.94217	8.50151	-0.44066	0.00912328
CLEC11A	C-type lectin domain family 11, member A	19	19q13.3	26	0.449853	1.97102	10.1857	9.75236	-0.433367	0.0234009
ALDH6A1	aldehyde dehydrogenase 6 family, member A1	14	14q24.3	26	0.382406	1.65806	9.19384	8.76313	-0.430716	0.016639
GALNT10	UDP-N-acetyl-alpha-D-galactosamine:polypeptide N-acetylgalactosaminyltransferase 10 (GalNAc-T10)	5	5q33.2	26	0.453629	1.49177	9.81417	9.38468	-0.429488	0.00419912
MGC33894	transcript expressed during hematopoiesis 2	17	17p11.2	26	0.492102	2.0504	9.54184	9.11483	-0.427002	0.0430718
C1orf54	chromosome 1 open reading frame 54	1	1q21.2	24	0.589764	2.37817	9.73602	9.31262	-0.423395	0.0442486
PGM1	phosphoglucomutase 1	1	1p31	26	0.495144	2.03342	12.2248	11.8017	-0.423061	0.0224103
HOXA13	homeobox A13	7	7p15-p14	3	0.415602	1.64976	4.67762	4.25548	-0.422136	0.0431686
PPP1R3C	protein phosphatase 1, regulatory (inhibitor) subunit 3C	10	10q23-q24	26	0.480593	2.09971	12.2461	11.8243	-0.42178	0.0284535
SLC25A37	solute carrier family 25, member 37	8	8p21.2	26	0.434162	1.45025	7.63175	7.21338	-0.418369	0.0289517
WDR18	WD repeat domain 18	19	19p13.3	26	0.438632	1.65981	9.81996	9.40409	-0.415867	0.00397045
HSPA12A	heat shock 70kDa protein 12A	10	10q26.12	26	0.455349	1.56702	8.24818	7.83355	-0.414631	0.0100022
SKP2	S-phase kinase-associated protein 2 (p45)	5	5p13	26	0.522046	1.99053	8.52714	8.11546	-0.411678	0.0386788
RIPK3	receptor-interacting serine-threonine kinase 3	14	14q11.2	18	0.338119	1.31712	8.27515	7.86993	-0.405226	0.00954994
THUMPD2	THUMP domain containing 2	2	2p22.1|2p22-p21	26	0.487791	1.89522	8.75937	8.35948	-0.399893	0.0364882
LHPP	phospholysine phosphohistidine inorganic pyrophosphate phosphatase	10	10q26.13	24	0.382839	1.83234	8.53713	8.14345	-0.393685	0.0023029
BAG4	BCL2-associated athanogene 4	8	8p11.23	2	0.360357	1.30777	6.79835	6.40566	-0.392688	0.0336153
SLC35D1	solute carrier family 35 (UDP-glucuronic acid/UDP-N-acetylgalactosamine dual transporter), member D1	1	1p32-p31	22	0.465814	1.70831	7.88907	7.49659	-0.392482	0.0256707
PSMA5	proteasome (prosome, macropain) subunit, alpha type, 5	1	1p13	26	0.397113	1.41719	11.3086	10.9162	-0.392411	0.0221815
SH3PXD2A	SH3 and PX domains 2A	10	10q24.33	26	0.31598	1.52838	9.88357	9.49184	-0.39173	0.00263876
PTGR1	prostaglandin reductase 1	9	9q31.3	26	0.41073	1.71135	10.969	10.5814	-0.387578	0.0499084
HOXA11AS	HOXA11 antisense RNA (non-protein coding)	7	7p15.2	2	0.350117	1.18582	5.85586	5.47049	-0.385377	0.0254259
LOC729678	hypothetical protein LOC729678	5	5q35.3	25	0.375313	1.60432	7.73355	7.34935	-0.384193	0.0216552
KCNK6	potassium channel, subfamily K, member 6	19	19q13.1	26	0.574249	2.655	9.12656	8.75115	-0.375413	0.0462545
MOSC2	MOCO sulphurase C-terminal domain containing 2	1	1q41	26	0.341364	1.49234	7.93516	7.56149	-0.373672	0.0129647
ARHGEF4	Rho guanine nucleotide exchange factor (GEF) 4	2	2q22	26	0.365587	1.48799	7.92229	7.54928	-0.373017	0.00587807
SERPINB9	serpin peptidase inhibitor, clade B (ovalbumin), member 9	6	6p25	13	0.399032	1.50934	6.2992	5.92797	-0.371237	0.0155539
PLA2G10	phospholipase A2, group X	16	16p13.1-p12	0	0.337721	1.38989	5.05612	4.68664	-0.369482	0.0156579
HSD17B1	hydroxysteroid (17-beta) dehydrogenase 1	17	17q11-q21	1	0.399232	1.59433	6.24751	5.87898	-0.368531	0.014148
SRPK3	SFRS protein kinase 3	X	Xq28	2	0.301528	1.2583	7.84812	7.48008	-0.368034	0.0138013
OMA1	OMA1 homolog, zinc metallopeptidase (S. cerevisiae)	1	1p32.2-p32.1	26	0.369341	1.57722	8.27585	7.90813	-0.367717	0.0163353
PIGZ	phosphatidylinositol glycan anchor biosynthesis, class Z	3	3q29	25	0.459671	1.65525	8.15027	7.78465	-0.365616	0.0416134
RTN2	reticulon 2	19	19q13.32	26	0.400278	1.25802	9.32922	8.96797	-0.361249	0.0125811
IDH2	isocitrate dehydrogenase 2 (NADP+), mitochondrial	15	15q26.1	26	0.372143	1.31269	11.2063	10.8459	-0.360371	0.0198446
TNIK	TRAF2 and NCK interacting kinase	3	3q26.2-q26.31	0	0.394026	1.50643	5.79243	5.43329	-0.359139	0.040737
DOK4	docking protein 4	16	16q21	26	0.325977	1.28649	8.25929	7.90029	-0.358999	0.00170035
FARP1	FERM, RhoGEF (ARHGEF) and pleckstrin domain protein 1 (chondrocyte-derived)	13	13q32.2	26	0.357456	1.78868	11.684	11.3274	-0.356615	0.0107442
BAG2	BCL2-associated athanogene 2	6	6p12.1-p11.2	26	0.401775	1.46777	11.3781	11.0246	-0.353483	0.03928
B3GALT4	UDP-Gal:betaGlcNAc beta 1,3-galactosyltransferase, polypeptide 4	6	6p21.3	25	0.358596	1.26287	8.62641	8.27424	-0.352161	0.034464
HEG1	HEG homolog 1 (zebrafish)	3	3q21.2	26	0.356888	1.64159	11.8855	11.5363	-0.349213	0.0101397
MEIS3	Meis homeobox 3	19	19q13.32	25	0.305551	1.3694	8.93865	8.59099	-0.347661	0.0096346
NHLRC3	NHL repeat containing 3	13	13q13.3	26	0.375273	1.34515	7.09055	6.75008	-0.34047	0.0366704
POLD4	polymerase (DNA-directed), delta 4	11	11q13	26	0.321641	1.47734	10.8027	10.4642	-0.338515	0.0243429
FZD4	frizzled homolog 4 (Drosophila)	11	11q14.2	13	0.371901	1.24312	7.7507	7.41271	-0.337992	0.0190288
LOC100133377	hypothetical protein LOC100133377	6		26	0.429429	1.75223	8.70614	8.36858	-0.337563	0.0463283
GMPR	guanosine monophosphate reductase	6	6p23	3	0.378138	1.37744	7.01029	6.67334	-0.336949	0.0308765
DUSP23	dual specificity phosphatase 23	1	1q23.2	12	0.349804	1.58229	9.65405	9.31821	-0.335841	0.0390582
RASSF5	Ras association (RalGDS/AF-6) domain family member 5	1	1q32.1	18	0.313087	1.24186	7.61586	7.2813	-0.334555	0.012372
WNT2B	wingless-type MMTV integration site family, member 2B	1	1p13	21	0.267956	0.968381	6.11302	5.78023	-0.332793	0.00738376
ERMP1	endoplasmic reticulum metallopeptidase 1	9	9p24	26	0.333375	1.28208	8.09718	7.76455	-0.332631	0.015444
PLCB1	phospholipase C, beta 1 (phosphoinositide-specific)	20	20p12	24	0.425834	1.44601	7.35471	7.02343	-0.331279	0.0468361
PLEKHA2	pleckstrin homology domain containing, family A (phosphoinositide binding specific) member 2	8	8p11.22	26	0.350675	1.11109	8.51764	8.18779	-0.329845	0.0204592
LOC729994	hypothetical LOC729994	19	19q13.43	0	0.408029	1.62112	5.16251	4.83397	-0.328545	0.0291861
RBPMS	RNA binding protein with multiple splicing	8	8p12-p11	26	0.312946	1.21931	10.8676	10.5391	-0.328519	0.0146071
ARSA	arylsulfatase A	22	22q13.31-qter|22q13.33	25	0.379902	1.44771	9.33774	9.00995	-0.327791	0.0240612
ARL15	ADP-ribosylation factor-like 15	5	5p15.2	10	0.258108	1.13354	5.12556	4.79853	-0.327033	0.0100469
TTC3	tetratricopeptide repeat domain 3	21	21q22.2	26	0.363701	1.44055	11.0477	10.721	-0.326695	0.0148576
SERHL2	serine hydrolase-like 2	22	22q13	21	0.357938	1.20536	7.47593	7.15036	-0.325572	0.0366265
SHC1	SHC (Src homology 2 domain containing) transforming protein 1	1	1q21	26	0.473407	2.17127	11.7751	11.4513	-0.323784	0.0464752
TOB2	transducer of ERBB2, 2	22	22q13.2-q13.31	24	0.448262	2.46858	8.85455	8.53176	-0.32279	0.0270645
